# Supplementary material
Source: PubMed Central journal article supplement (PMC2529044)
Supplement: 0806192105_0806192105SI.pdf [file 0806192105_0806192105SI.pdf]

# Supporting Information

Petersen *et al.* 10.1073/pnas.0806192105

## SI Materials and Methods

**In Vitro Synthesis of the F<sub>1</sub>β Precursor Protein.** A pTZ18U plasmid containing cDNA of the pF<sub>1</sub>β subunit of the ATP synthase from *N. plumbaginifolia* was used for the *in vitro* expression of the precursor protein. The protein was produced in a coupled transcription-linked translation reticulocyte lysate TNT system (Promega) in the presence of [<sup>35</sup>S]-labeled methionine (GE Healthcare AB) in accordance with the Promega protocol (1).

**Immunoblotting.** After import assay, the mitochondrial pellet was dissolved in Laemmli sample buffer (2) and boiled for 5 min. Samples were loaded on 10 to 20% TricineGlycine SDS-PAGE gels (BioRad) and then transferred to nitrocellulose membrane. The membrane was then boiled in PBS for 5 min and blocked in 5% nonfat milk and incubated with primary antibody overnight (1:500 of αAβ40, αAβ42, or 4G8, Table S1). The membranes were subsequently incubated with secondary antibody (HRP-linked antibody, Amersham Biosciences, GE Healthcare AB) and developed using the Pierce Super Signal West Pico chemiluminescence substrate kit (Pierce, Thermo Fisher Scientific).

**Quantification of Gold Particles After Import Assay by Immunoelectron Microscopy.** Images were taken randomly at a primary magnification of 21,500 × and individual mitochondria were

taken at a primary magnification of 60,000 × and printed. To evaluate the distribution of labeling within the fraction, the gold particles over mitochondria and the gold particles outside mitochondria were counted and the corresponding area was estimated by point counting on printed images and expressed as gold particles/μm<sup>2</sup> (3). On higher magnification the gold particles at cristae membrane, in mitochondria matrix or at the periphery (outer membrane) in individual mitochondria, were counted and the distribution was calculated.

**Immunohistochemical Staining.** Seven μm thick sections were deparaffinised and manually immunostained with antibody directed to Aβ. The labeled streptavidin-biotin method (Histostain-Plus Kit, Zymed) was used with Romulin 3-amino-9-ethylcarbazole (Romulin AEC) chromogen (Biocare Medical). The sections were counterstained with Harris' hematoxylin (Merck), dehydrated, and mounted in DePex (BDH Laboratory Supplies). Omission of primary antibodies revealed no detectable staining. The stained sections were assessed under light microscopy at 100 to 200× magnifications and search for fleecy, diffuse, and dense plaques, as well as for amyloid angiopathy.

1. Boutry M, Chua NH (1985) A nuclear gene encoding the beta subunit of the mitochondrial ATP synthase in *Nicotiana plumbaginifolia*. *Embo J* 4:2159–2165.
2. Laemmli UK (1970) Cleavage of structural proteins during the assembly of the head of bacteriophage T4. *Nature* 227:680–685.

3. Weibel, E (1979) *Practical Methods for Biological Morphometry* (Academic, London), Vol. 1.

Table S1. Clinical data of patients from whom brain biopsies were collected during neurosurgery of normal pressure hydrocephalus

| Case | PAD                                   | A $\beta$ in mitochondria | Age at biopsy | Gender | Leading symptoms                      | NPH | Cognition                   | MMSE                                                                                   | Duration of cognitive symptoms | Other disease                                                       |
|------|---------------------------------------|---------------------------|---------------|--------|---------------------------------------|-----|-----------------------------|----------------------------------------------------------------------------------------|--------------------------------|---------------------------------------------------------------------|
| 1    | Parenchymal amyloid aggregation       | +                         | 73            | Male   | Cognitive impairment, gate difficulty | +   | Mild decline                | 25                                                                                     | 2 years                        | DM, hypertension, cardiovascular disease                            |
| 2    | Parenchymal amyloid aggregation       | +                         | 75            | Male   | Cognitive impairment, gate difficulty | -   | Severe dementia             | <10, not reliable evaluation due to poor co-operation (bedridden in old people's home) | Clear decline in 1 year        | Parkinson symptoms several years, epilepsy                          |
| 3    | Intracellular hyperphosphorylated tau | -                         | 80            | Male   | Gate difficulty                       | +   | Mild dementia               | 14                                                                                     | 2-3 years                      | Mainly motor symptoms (suspected PSP)<br>DM, cardiovascular disease |
| 4    | Parenchymal amyloid aggregation       | +                         | 76            | Female | Gate difficulty                       | +   | Mild decline                | 27                                                                                     | 0                              | Post polio                                                          |
| 5    | Parenchymal amyloid aggregation       | +                         | 58            | Female | Gate difficulty, cognitive impairment | +   | Normal/only mild decline    | >27                                                                                    | 6 months                       | -                                                                   |
| 6    | No pathology                          | -                         | 53            | Male   | Cognitive impairment                  | +*  | Mild decline                | 27                                                                                     | 1 year                         | Glaucoma                                                            |
| 7    | Parenchymal amyloid aggregation       | +                         | 71            | Male   | Cognitive impairment, gate difficulty | -   | Moderate to severe dementia | 14                                                                                     | 2-3 years                      | TIA, cardiovascular disease                                         |

\*Obstructive hydrocephalus (chronic); DM, diabetes mellitus; MMSE, mini-mental state examination; NPH, normal pressure hydrocephalus; PSP, progressive supranuclear palsy; TIA, transient ischemic attack.

**Table S2. List of antibodies used in this study**

| Antibody               | Raised towards                     | Name                      | Company/gift giver    | Purpose                             |
|------------------------|------------------------------------|---------------------------|-----------------------|-------------------------------------|
| $\alpha$ -A $\beta$    | Amino acids 17–24                  | 4G8                       | Signet                | Detection of A $\beta$              |
| $\alpha$ -A $\beta$ 40 | A $\beta$ <sub>40</sub> C-terminus | 44–348                    | Biosource             | Detection of A $\beta$ 40           |
| $\alpha$ -A $\beta$ 42 | A $\beta$ <sub>42</sub> C-terminus | 44–344                    | Biosource             | Detection of A $\beta$ 42           |
| JN <sub>1-42</sub>     | A $\beta$ <sub>42</sub> C-terminus |                           | Dr. Jan Näslund       | Detection of A $\beta$ 42 by iEM    |
| $\alpha$ -Tom20        | Amino acids 1–145                  | FL-145 SC-11415           | Santa Cruz            | Inhibition of Tom 20                |
| $\alpha$ -Tom40        | Amino acids 62–361                 | H300, SC11414             | Santa Cruz            | Inhibition of Tom 40                |
| $\alpha$ -Tom70        | C-terminus                         | C18, SC26495              | Santa Cruz            | Inhibition of Tom 70                |
| $\alpha$ -VDAC         | Amino acids 185–197                | Anti-Porin (Ab-5) PC-548T | Calbiochem            | Inhibition of VDAC                  |
| $\alpha$ -Grp75        | C-terminus                         |                           | Prof. Elzbieta Glaser | Purity of fractionated mitochondria |
| $\alpha$ -NDUFS4       | Full-length                        | MS104                     | MitoSciences          | Purity of fractionated mitochondria |
